# Supplementary material for: Absolute neutrophil count by Duffy status among healthy Black and African American adults
Source: PubMed Central journal article supplement — Blood Adv. 2022 Aug 27;7(3):317–20. doi: 10.1182/bloodadvances.2022007679 (PMC9881043; doi:10.1182/bloodadvances.2022007679), 2022-08-27
Supplement: BLOODA_ADV-2022-007679-mmc1.pdf [file BLOODA_ADV-2022-007679-mmc1.pdf]

**AUTOIMMUNE**

**TYPE 1 DIABETES, RHEUMATOID ARTHRITIS, PSORIASIS, MULTIPLE SCLEROSIS, SYSTEMIC LUPUS ERYTHEMATOSUS, INFLAMMATORY BOWEL DISEASE, ADDISON’S DISEASE, GRAVES’ DISEASE, HASHIMOTO THYROIDITIS, MYASTHENIA GRAVIS, SJOGREN’S SYNDROME, PERNICIOUS ANEMIA, AUTOIMMUNE VASCULITIS, CELIAC DISEASE, AUTOIMMUNE HEPATITIS, VITILIGO, IMMUNE THROMBOCYTOPENIA, DERMATOMYOSITIS.**

|                         |                                                                                                                                                                                                                                                                                                                     |
|-------------------------|---------------------------------------------------------------------------------------------------------------------------------------------------------------------------------------------------------------------------------------------------------------------------------------------------------------------|
| <b>IMMUNODEFICIENCY</b> | Any primary immunodeficiency including chronic granulomatous disease, common variable immunodeficiency, Chediak-Higashi syndrome, cyclic neutropenia, leukocyte adhesion defects, or congenital neutropenia. Any individual with previous assessment for or diagnosis of neutropenia of any kind was also excluded. |
| <b>INFECTIOUS</b>       | Hepatitis C infection, hepatitis B infection, HIV                                                                                                                                                                                                                                                                   |
| <b>MALIGNANCY</b>       | Any malignant neoplasm or hematological cancer including ductal carcinoma in situ, intraductal papillary mucinous neoplasm, or MGUS                                                                                                                                                                                 |
| <b>TRANSPLANT</b>       | Any history of receiving organ transplant or skin graft including history of allogenic or autologous hematopoietic stem cell transplant                                                                                                                                                                             |
| <b>MEDICATION</b>       | Carbimazole, clozapine, dapsone, dipyrrone, methimazole, penicillin G, procainamide, propylthiouracil, rituximab, sulfasalazine, ticlopidine, hydroxychloroquine, infliximab, lamotrigine, oxacillin, quinine, infliximab, trimethoprim-sulfamethoxazole. Any chemotherapeutic agent or biologic                    |

**Supplemental Material Table 1:** Exclusion criteria for patients presenting for non-urgent care visits at a single primary care center grouped by exclusion criteria type.
